# Supplementary material for: Precisely designed perylene bisimide-substituted polyethylene with a high glass transition temperature and an ordered architecture
Source: Royal Society of Chemistry journal article supplement (doi:10.1039/c5ra10049f), 2015-01-01
Supplement: c5ra10049f1.pdf [file c5ra10049f1.pdf]

## Supporting Information

Precise perylene bisimide-substituted polyethylene with high glass transition temperature and ordered architecture

Wei Song, Jianhua Wu, Guangda Yang, Huijing Han, Meiran Xie\* and Xiaojuan Liao\*

*School of Chemistry and Molecular Engineering, East China Normal University, Shanghai 200241, China*

Corresponding Authors

\*(M. X.) Tel: +86 21 54340058. Fax: +86 21 54340058.

E-mail: [mrxie@chem.ecnu.edu.cn](mailto:mrxie@chem.ecnu.edu.cn).

\*(X. L.) Tel: +86 21 54340105. Fax: +86 21 54340105.

E-mail: [xjliao@chem.ecnu.edu.cn](mailto:xjliao@chem.ecnu.edu.cn).

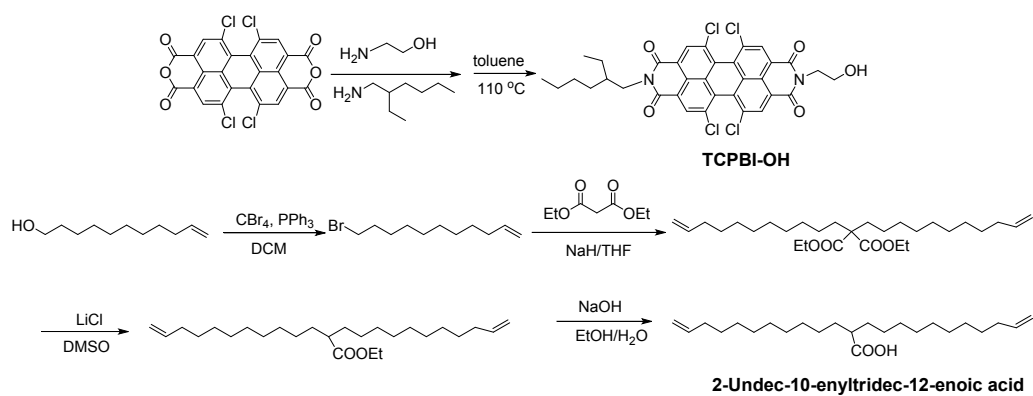

**Scheme S1** Syntheses of TCPBI-OH and 2-undec-10-enyltridec-12-enoic acid.

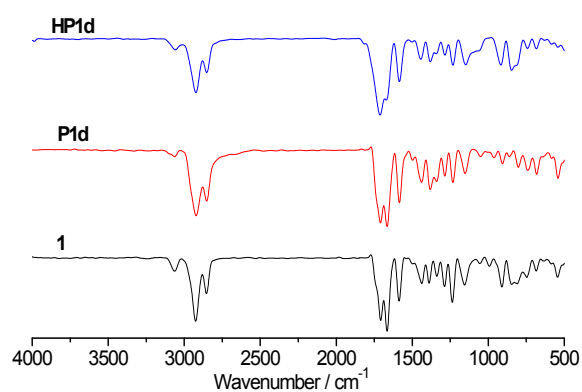

**Fig. S1** IR spectra of monomer **1** and the relative polymers.

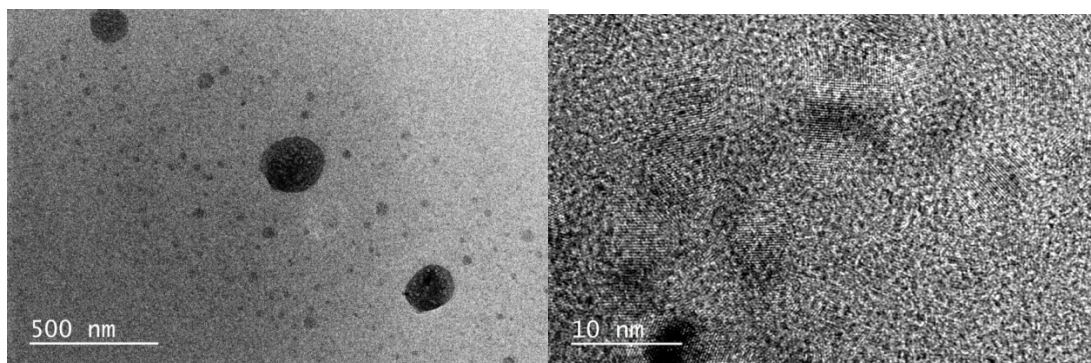

**Fig. S2** TEM images of **P1d**.

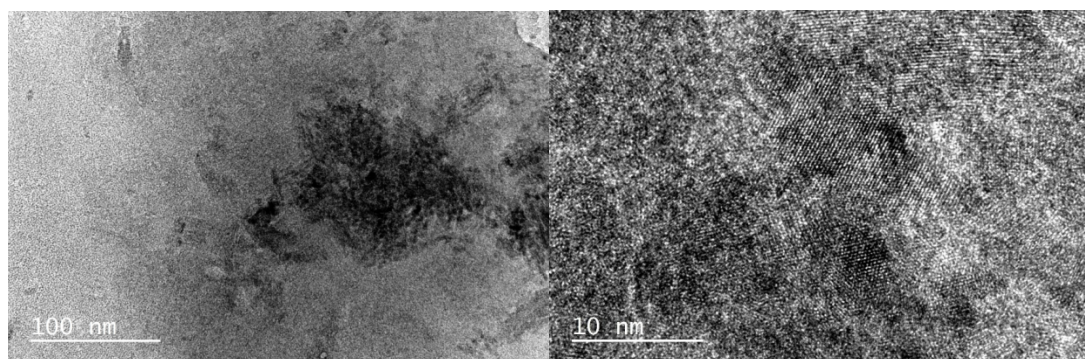

**Fig. S3** TEM images of **HP1d**.

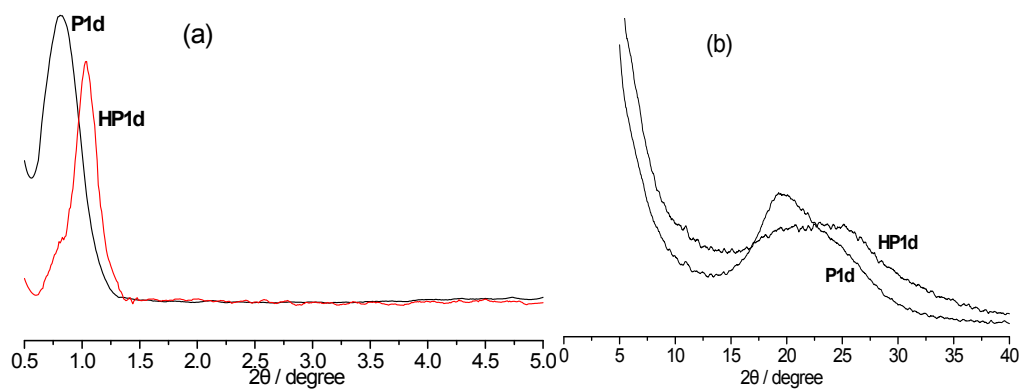

**Fig. S4** XRD patterns of **P1d** and **HP1d**.

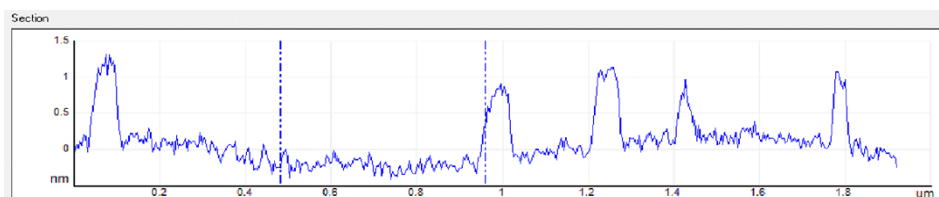

**Fig. S5** Section analysis of AFM image of **HP1d**.

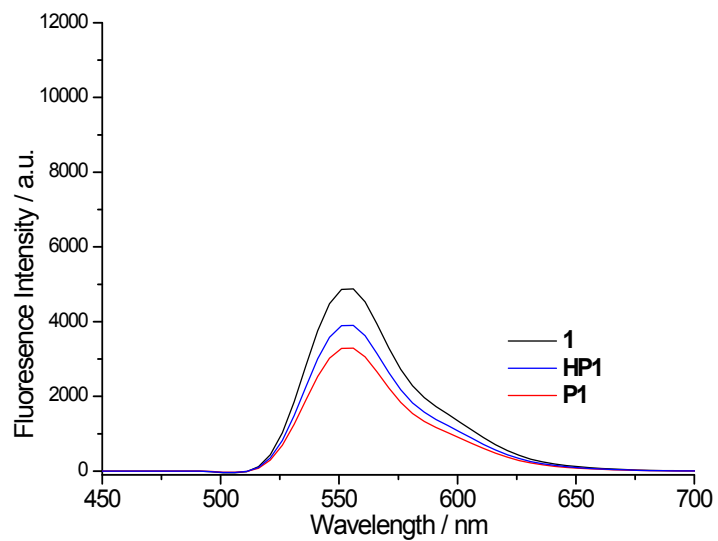

**Fig. S6** Emission spectra of monomer and polymers under illumination in  $\text{CHCl}_3$  solution excited at 522 nm;  $\Phi_F$  was estimated using 9,10-diphenylanthracene ( $\Phi = 90\%$ ) as standard.
